# Supplementary material for: Sustainable valorization of citrus by-products: natural deep eutectic solvents for bioactive extraction and biological applications of Citrus sinensis peel
Source: Springer Nature journal article supplement (doi:10.1007/s00217-025-04757-3), 2025-05-03
Supplement: MOESM1 [file 217_2025_4757_MOESM1_ESM.docx]

**Valorization of food byproducts: green solvents for bioactive extraction and biological applications of citrus sinensis peel**

Clara Gomez-Urios1,2, Lorenzo Siroli2,3, Silvia Grassi4,Francesca Patrignani2,3, Jesus Blesa1, Rosalba Lanciotti2,3, Ana Frígola1, Stefania Iametti3, Maria J Esteve1*, and Mattia Di Nunzio4

1. *Nutrition and Food Science. Faculty of Pharmacy, University of Valencia, Avda. Vicent Andrés Estellés, s/n, 46100, Burjassot (Valencia), Spain*
2. *Interdepartmental Centre for Agri-Food Industrial Research, University of Bologna, Campus of Food Science, Via Quinto Bucci 336, Cesena (FC), Italy*
3. *Department of Agricultural and Food Sciences, University of Bologna, Piazza Gabriele Goidanich 60, 47521 Cesena (FC), Italy*
4. *Department of Food, Environmental and Nutritional Sciences (DeFENS), University of Milan, Via Celoria 2, 20133 Milan, Italy*

**Corresponding Author: +34963544913,* [*maria.jose.esteve@uv.es*](mailto:maria.jose.esteve@uv.es)

**Supplementary Material**

**Figure S1.** Example of agar spot test with wells containing 50 μL of *Staphylococcus epidermis* and observation of inhibition diameters after 24 hours of incubation.

*A: 50% EtOH extract. B: ChChl:Gly:CA extract*

**Table S1**. Identification parameters of phenolic compounds by UPLC-TOF-MS / MS

| **Compounds** | **Molecular formula** | ***m/z*** | **[*m*-H]** | **Error**  **(ppm)** |
| --- | --- | --- | --- | --- |
| **Phenolic acids** |  |  |  |  |
| p-Coumaric acid | C9H8O3 | 164.0473 | 163.04007 | 1.8 |
| Ferulic acid | C10H10O4 | 194.0579 | 193.05063 | -0.2 |
| *Total phenolic acids* |  |  |  |  |
| **Flavanones** |  |  |  |  |
| Hesperidin | C28H34O15 | 610.1897 | 609.18249 | -0.9 |
| Rutin | C27H30O16 | 610.1533 | 609.14611 | -0.9 |
| Narirutin | C27H32O14 | 580.1792 | 579.17193 | -1.2 |
| *Total flavanones* |  |  |  |  |
| **Total phenolic compounds** |  |  |  |  |
